# Supplementary material
Source: publisher figshare collection journal article supplement (https://acs.figshare.com/ndownloader/files/4627579)
Supplement: Supplementary file 1 [file 4627579]

## Supporting Information

### 1. Elemental analysis

The elemental analysis was carried out with a CHN. Corder (MT-5, YANACO). The SQ contents were calculated from the nitrogen contents obtained by elemental analysis. The results are listed in Table S1.

Table S1 Elemental Analysis

| Code          | SQ<br>(mol%) | C            |               | H            |               | N            |               |
|---------------|--------------|--------------|---------------|--------------|---------------|--------------|---------------|
|               |              | found<br>(%) | calcd.<br>(%) | found<br>(%) | calcd.<br>(%) | found<br>(%) | calcd.<br>(%) |
| p(DDA/SQF3)   | 2.7          | 69.29        | 69.27         | 11.05        | 11.07         | 5.12         | 5.12          |
| p(DDA/SQF7)   | 7.0          | 61.65        | 62.26         | 9.12         | 9.73          | 4.26         | 4.26          |
| p(DDA/SQPh6)  | 6.0          | 70.69        | 70.58         | 10.29        | 10.41         | 4.65         | 4.54          |
| p(DDA/SQPh10) | 10.2         | 68.21        | 68.27         | 9.49         | 9.55          | 3.87         | 3.87          |
| p(DDA/SQPh22) | 22.2         | 62.91        | 63.48         | 7.78         | 7.69          | 2.56         | 2.56          |

## 2. $\pi - A$ isotherms

We measured  $\pi - A$  isotherms of p(DDA/SQ)s varying the temperature of the water subphase. Figure S1 shows  $\pi - A$  isotherms of p(DDA/SQPh)s. All figures show steeper rise in surface pressure and higher collapse pressure at 15°C, indicating that p(DDA/SQ)s form more stable monolayers at 15°C.

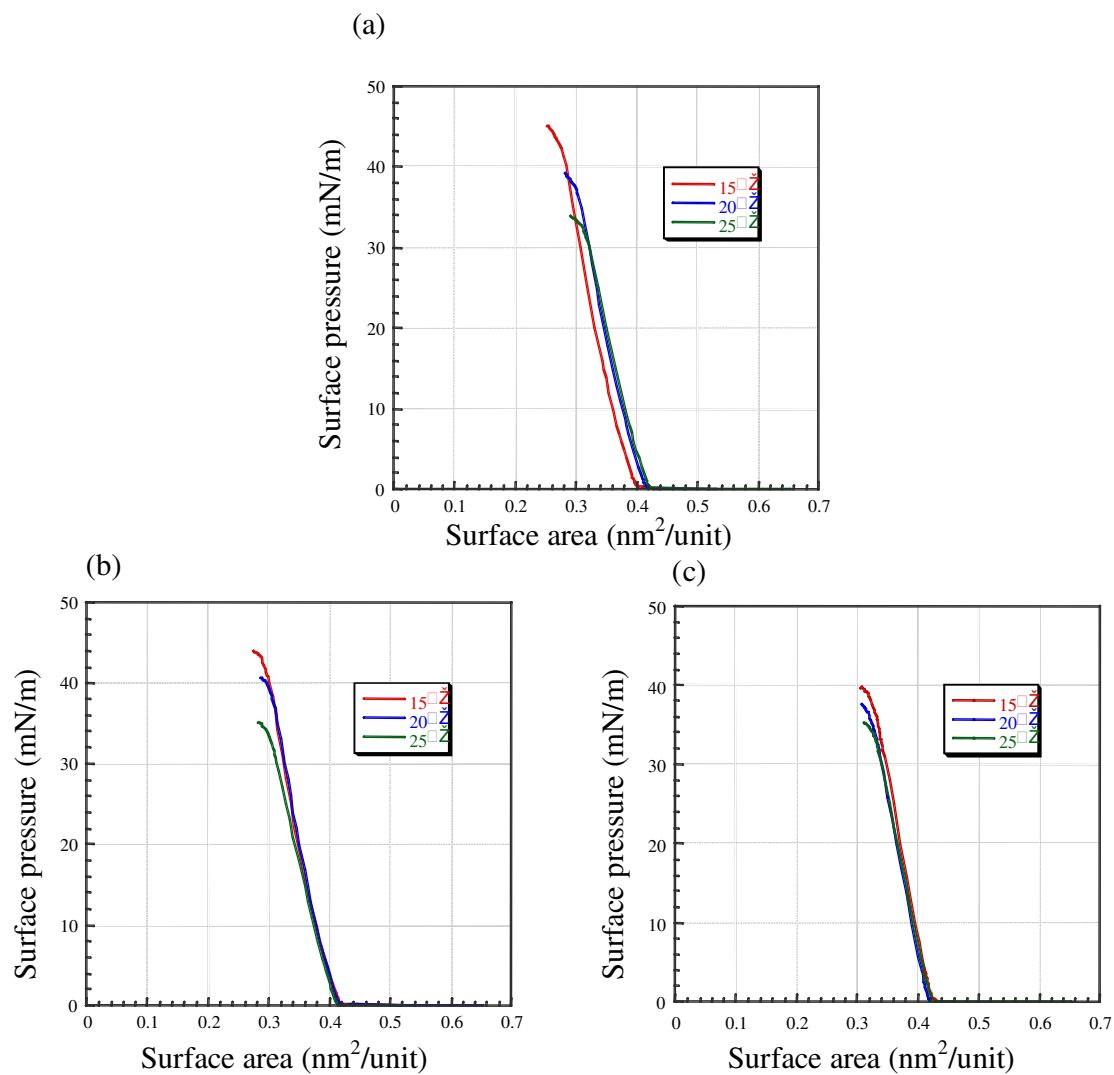

Figure S1.  $\pi - A$  isotherms of p(DDA/SQPh)s as a function of temperature; (a) p(DDA/SQPh6), (b) p(DDA/SQPh10), and (c) p(DDA/SQPh22).

### 3. Thermal Analysis

The thermogravimetric differential thermal analysis (TG-DTA) was carried out using a thermogravimetric analyzer (Model Thermo Plus TG8120, RIGAKU) in the temperature range of 25-600 °C under argon atmosphere at a heating rate of 5 °C/min. The mass of sample used was between 4 and 6 mg. Figure S2 shows the results. The mass loss was listed in Table S2. The calculated values were obtained assuming that only pDDA comonomer was decomposed.

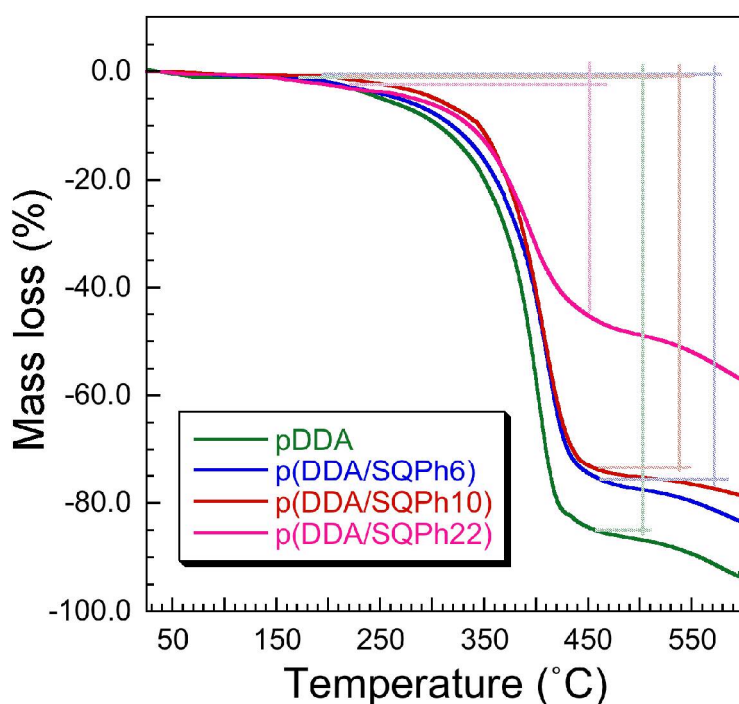

Figure S2 TG-DTA traces of p(DDA/SQPh)s under argon atmosphere.

Table S2 Mass loss of p(DDA/SQ)s.

| Code          | calculated (%) | experimental (%) |
|---------------|----------------|------------------|
| pDDA          | -100           | -84.6            |
| p(DDA/XQPh6)  | -77.8          | -75.5            |
| p(DDA/XQPh10) | -66.5          | -70.1            |
| p(DDA/XQPh22) | -43.9          | -44.3            |
